# Supplementary material for: How media presence triggers participation in citizen science—The case of the mosquito monitoring project ‘Mückenatlas‘
Source: PubMed Central journal article supplement (PMC8853470; doi:10.1371/journal.pone.0262850), 2022-02-17
Supplement: pone.0262850.s002.pdf [file pone.0262850.s002.pdf]

## S1 Figure

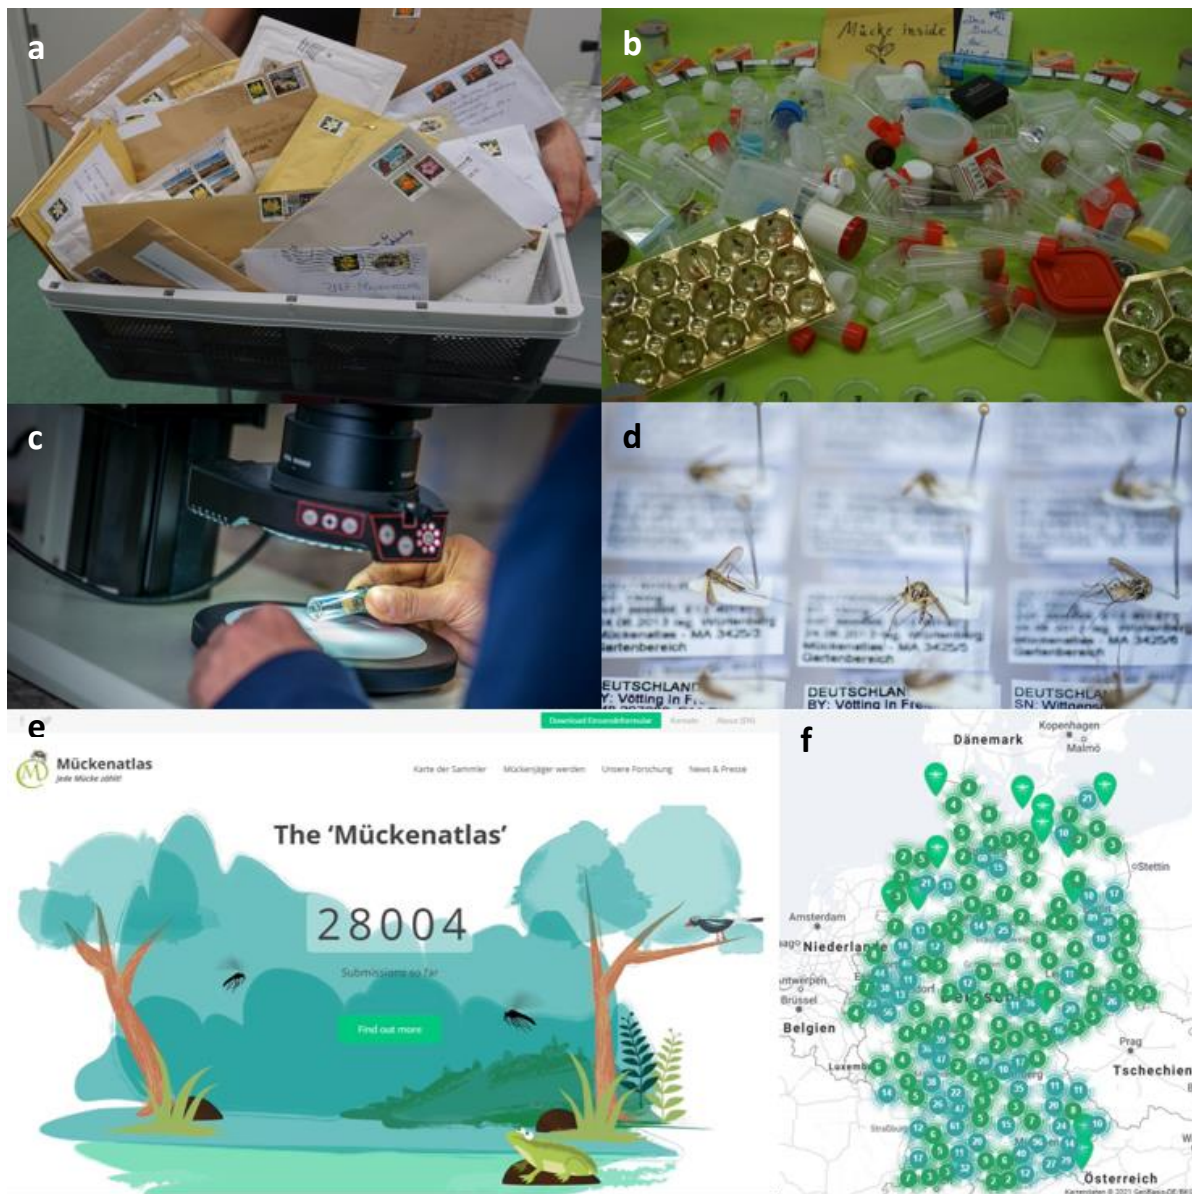

**S1 Fig: Impressions from the workflow of the 'Mückenatlas'.** (a) During the mosquito season, the submissions arrive in boxes (Photo: Nadja Pernat/ZALF). (b) The participants are very creative in packing the samples (Photo: Nadja Pernat/ZALF). (c) Every mosquito sample is identified to species level and uploaded to the German database for Culicid research (Photo: Jarno Müller/ZALF). (d) Well-preserved and special finds are kept in a reference collection (Photo: Jarno Müller/ZALF). (e) The submission counter on the homepage [www.mueckenatlas.com](http://www.mueckenatlas.com) informs about the progress. (f) Every participant who wants to get a marker with a name or pseudonym on the collector's map on the website.

## S2 Figure

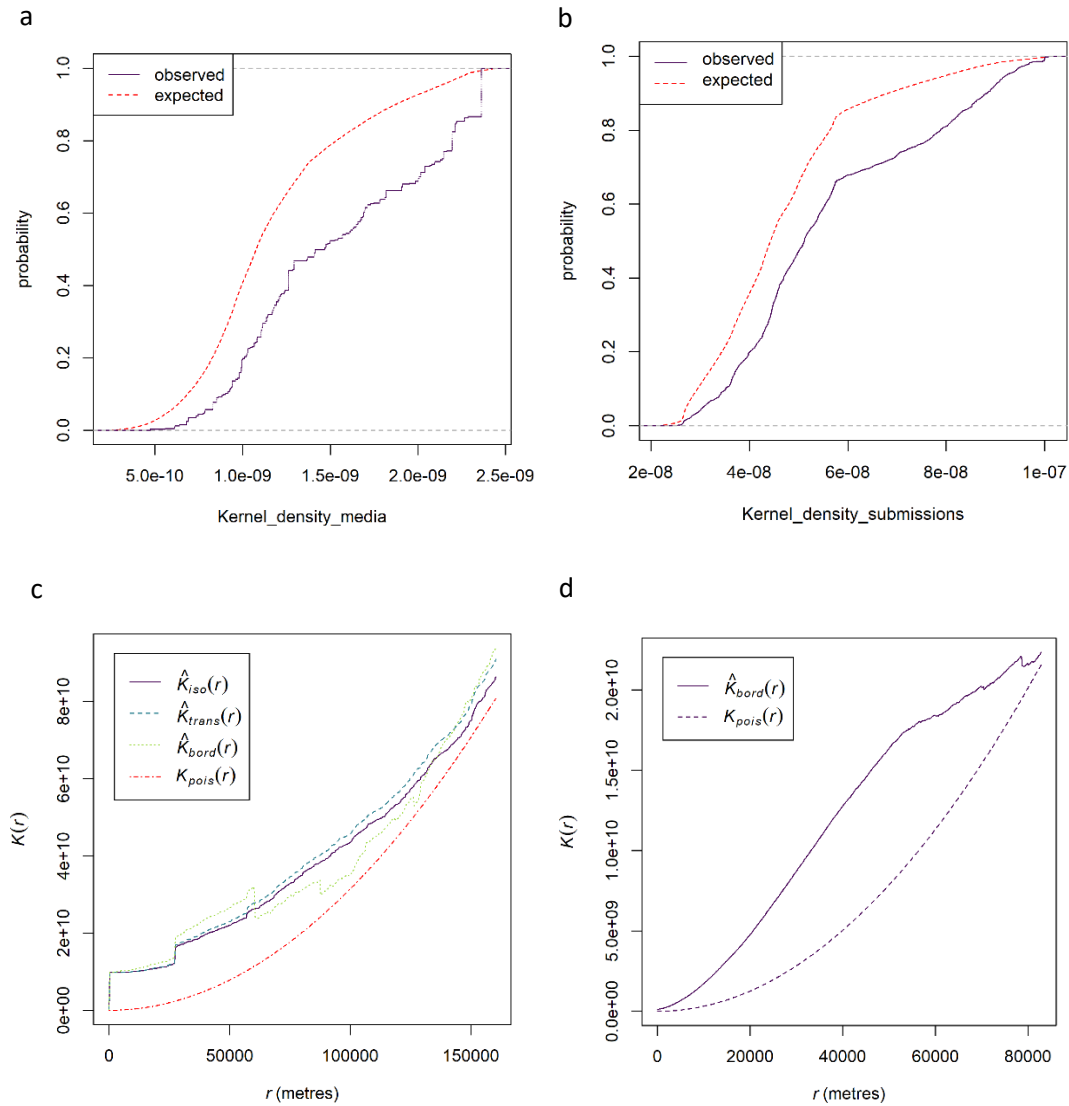

**S2 Fig: Plotted results of the Kolmogorov-Smirnov test.** Based on Kernel density of geo-references as spatial covariate for (a) media reports and (b) submissions, indicating a non-random distribution of both point pattern datasets across Germany. Ripley's K function suggests a clustering of both point patterns, for (c) media reports and (d) 'Mückenatlas' submissions (right column). As the number of points for the submission dataset exceeds 3000, only border correction estimations (no edge effects) could be calculated for (d).

### S3 Figure

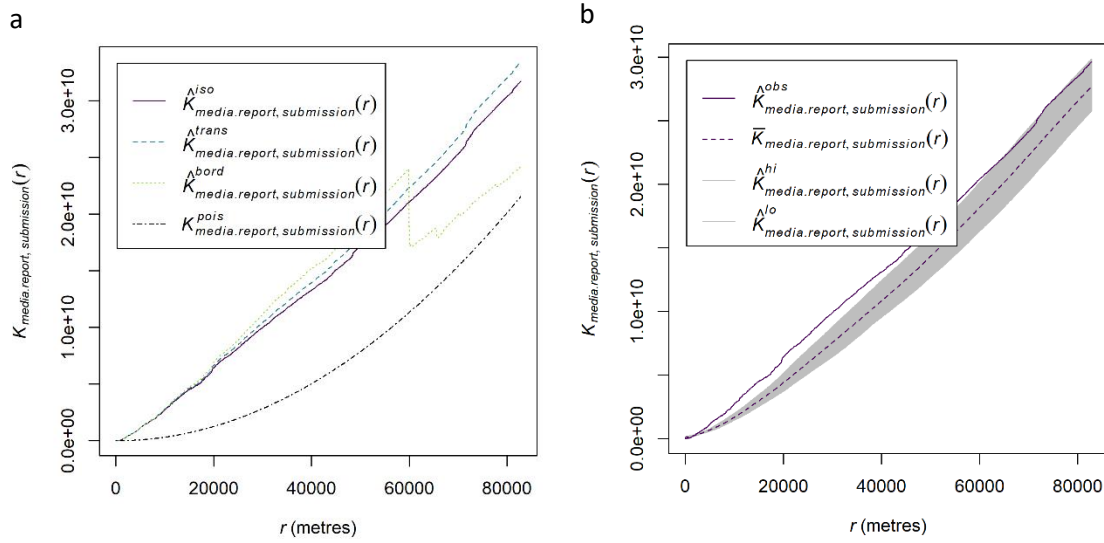

**S3 Fig: Cross K-function and Monte Carlo simulation.** (a) Bivariate Ripley's K function (Cross K-function) testing for similar clustering of media reports and submissions for distances up to 80 km. (b) Cross K-function (black line) with simulation mean (dashed line) and significance bands (grey area) for random labelling applying a Monte Carlo simulation with 100 permutations.

**S1 Table: List of variables of the media clipping dataset.** Original variables (renamed) are highlighted in white and additionally programmed variables for analysis are highlighted in grey.

| <b>Provided variables</b>                | <b>Explanation</b>                                                                                          |
|------------------------------------------|-------------------------------------------------------------------------------------------------------------|
| Search terms (searcht)                   | Search term responsible for the hit                                                                         |
| Publication date (date)                  | Exact date of media report                                                                                  |
| Headline (head)                          | Headline of the media report                                                                                |
| Format (rad.tv)                          | Premiere or rerun                                                                                           |
| Link                                     | URL to online media type                                                                                    |
| Media title (med.tit.cat)                | Title of newspaper, radio or tv programme                                                                   |
| Channel (med.ch)                         | Name of media channel (e.g. broadcaster of tv/radio show)                                                   |
| Media type (med.ty.cat)                  | Category of media ('TV', 'online', 'print', 'radio', 'news agency')                                         |
| Media category (med.ty.fine)             | Refined media type (e.g. for TV documentary, news etc.)                                                     |
| <b>Additionally programmed variables</b> |                                                                                                             |
| year                                     | Year of media report                                                                                        |
| yearm                                    | Year and month of media report                                                                              |
| Municipality (med.muni)                  | Municipality of origin (see Supplementary Table S2)                                                         |
| xvalue                                   | Longitude if municipality is given (see Supplementary Table S2)                                             |
| yvalue                                   | Latitude if municipality is given (see Supplementary Table S2)                                              |
| Federal state (med.county)               | Federal state of origin if applicable (see Supplementary Table S2)                                          |
| Reach (reach)                            | Geographical reach ('regional', 'single federal', 'cross federal', 'national') (see Supplementary Table S2) |

## S2 Table: Categorisation method

In general, the categorisation and localisation of media contributions focused on the region to which they were addressed. A large part of the individual media were unknown, so that the distribution or broadcasting area was determined with the help of the Internet.

### Case 1: media with national reach

National television, print and radio stations (e.g. *ARD, ZDF, Deutschlandfunk*) and general websites (e.g. *gmx, 1&1, zeit online*). In these cases, no geo-coordinates were created for media reports.

Categorisation:

- Variable: Reach = "national"
- Variable: Municipality = "national"
- Variable: Federal state = "national"

### Case 2: media with reach over more than one federal state

Radio and television stations with an broadcasting area of more than one federal state, and some websites targeting several federal counties (e.g. *rbb*). In these cases, no geo-coordinates were created for media reports.

Categorisation:

- Variable: Reach = "cross federal"
- Variable: Municipality = "federal"
- Variable: Federal state = "several"

### Case 3: media targeting a single federal state or smaller region

Predominantly regional media, radio and television stations of individual federal states (e.g. *Die Glocke, WDR 2, BR Fernsehen*), and some websites aiming at a regional audience (e.g. *leinetal24.de*). If the distribution/broadcasting area concerned a city with its suburbs (e.g., *Augsburger Allgemeine*) or fewer than five municipalities (e.g. *Oberhessische Zeitung*), the geographic coordinates of the headquarters of the editorial office were used as the location for the corresponding media report. In addition, the name of the municipality was assigned to the media report in the category "Municipality" and the reach was set to "regional". If the distribution/broadcasting area concerned more than one city and several regions (e.g. "Ostsee-Zeitung", WDR), no geo-location was assigned and the category "Municipality" was set to "federal". In both cases the name of the respective federal state was listed in the category "Federal state".

Categorisation:

- Variable: Reach = "regional" or "single federal"
- Variable: Municipality = #respective name of the municipality or "federal"
- Variable: Federal state = #respective name of federal state

Below is the table with the respective assignments of the media reports to the categories. The number of formats is less than the number of all media reports, since the formats are sometimes doubled.

| Media report title                | Media channel                                                                                       | Reach         | Municipality | Federal state |
|-----------------------------------|-----------------------------------------------------------------------------------------------------|---------------|--------------|---------------|
| ARD-Buffer                        | ARD Arbeitsgemeinschaft der öffentlich-rechtlichen Rundfunkanstalten der Bundesrepublik Deutschland | cross federal | federal      | several       |
| ARD Infonacht                     | MDR Aktuell                                                                                         | cross federal | federal      | several       |
| ARD Infonacht                     | SWR Aktuell                                                                                         | cross federal | federal      | several       |
| Auf ein Wort                      | NDR Info                                                                                            | cross federal | federal      | several       |
| Bild Berlin-Brandenburg           | NA                                                                                                  | cross federal | federal      | several       |
| Das Informationsprogramm          | NDR Info                                                                                            | cross federal | federal      | several       |
| DASDING                           | DASDING (SWR)                                                                                       | cross federal | federal      | several       |
| Die Profis                        | radioeins                                                                                           | cross federal | federal      | several       |
| Die Welt in 60 Sekunden           | 94,3 rs2 Berlin-Brandenburg Radio                                                                   | cross federal | federal      | several       |
| Frankenschau aktuell              | Bayerisches Fernsehen Nord                                                                          | cross federal | federal      | several       |
| Hallo Niedersachsen               | NDR Niedersachsen                                                                                   | cross federal | federal      | several       |
| Hallo Niedersachsen (Mo-So 11:00) | NDR Norddeutscher Rundfunk Anstalt des öffentlichen Rechts                                          | cross federal | federal      | several       |
| Hauptsache gesund                 | MDR Mitteldeutscher Rundfunk - Anstalt des Öffentlichen Rechts                                      | cross federal | federal      | several       |
| HNA Hessische                     | NA                                                                                                  | cross federal | federal      | several       |
| Niedersächsische Allgemeine       | NA                                                                                                  | cross federal | federal      | several       |
| inFranken.de                      | NA                                                                                                  | cross federal | federal      | several       |
| JUMP                              | MDR JUMP                                                                                            | cross federal | federal      | several       |
| Kreiszeitung.de                   | NA                                                                                                  | cross federal | federal      | several       |
| Länder Eins30                     | MDR Mitteldeutscher Rundfunk - Anstalt des Öffentlichen Rechts                                      | cross federal | federal      | several       |
| Lausitzer Rundschau               | NA                                                                                                  | cross federal | federal      | several       |
| Logo                              | NDR Info                                                                                            | cross federal | federal      | several       |
| Main-Echo                         | NA                                                                                                  | cross federal | federal      | several       |
| Main-Spitze                       | NA                                                                                                  | cross federal | federal      | several       |
| MDR                               | MDR Mitteldeutscher Rundfunk - Anstalt des Öffentlichen Rechts                                      | cross federal | federal      | several       |
| MDR aktuell                       | MDR Mitteldeutscher Rundfunk - Anstalt des Öffentlichen Rechts                                      | cross federal | federal      | several       |
| MDR JUMP                          | NA                                                                                                  | cross federal | federal      | several       |
| MDR um 11                         | MDR Mitteldeutscher Rundfunk - Anstalt des Öffentlichen Rechts                                      | cross federal | federal      | several       |
| MDR um 2                          | MDR Mitteldeutscher Rundfunk - Anstalt des Öffentlichen Rechts                                      | cross federal | federal      | several       |
| Mitteldeutscher Rundfunk MDR      | NA                                                                                                  | cross federal | federal      | several       |
| Nachrichten 06:00                 | 94,3 rs2 Berlin-Brandenburg Radio                                                                   | cross federal | federal      | several       |
| Nachrichten 10:00                 | BB Radio Länderwelle Berlin/Brandenburg GmbH & Co. KG                                               | cross federal | federal      | several       |
| Nachrichten 13:00                 | BB Radio Länderwelle Berlin/Brandenburg GmbH & Co. KG                                               | cross federal | federal      | several       |
| Nachrichten 14:00                 | SWR Aktuell                                                                                         | cross federal | federal      | several       |
| Nachrichten 15:00                 | Spreeradio 105,5                                                                                    | cross federal | federal      | several       |
| Nachrichten 15:00                 | SWR 2                                                                                               | cross federal | federal      | several       |
| Nachrichten 15:00                 | SWR Aktuell                                                                                         | cross federal | federal      | several       |
| Nachrichten 17:00                 | Spreeradio 105,5                                                                                    | cross federal | federal      | several       |
| Nachrichtenradio                  | MDR Aktuell                                                                                         | cross federal | federal      | several       |
| NDR                               | NA                                                                                                  | cross federal | federal      | several       |
| nordbuzz                          | NA                                                                                                  | cross federal | federal      | several       |
| Nordmagazin                       | NDR Norddeutscher Rundfunk Anstalt des öffentlichen Rechts                                          | cross federal | federal      | several       |
| OZON unterwegs                    | RBB Rundfunk Berlin Brandenburg Anstalt des öffentlichen Rechts                                     | cross federal | federal      | several       |

|                                         |                                                                                                            |               |          |          |
|-----------------------------------------|------------------------------------------------------------------------------------------------------------|---------------|----------|----------|
| Planet Wissen                           | RBB Rundfunk Berlin Brandenburg<br>Anstalt des öffentlichen Rechts                                         | cross federal | federal  | several  |
| Prignitzer.de                           | NA                                                                                                         | cross federal | federal  | several  |
| radioeins (16:00-19:00)                 | radioeins                                                                                                  | cross federal | federal  | several  |
| rbb aktuell                             | RBB Rundfunk Berlin Brandenburg<br>Anstalt des öffentlichen Rechts                                         | cross federal | federal  | several  |
| rbb Rundfunk Berlin-<br>Brandenburg     | NA                                                                                                         | cross federal | federal  | several  |
| rbb um 4                                | RBB Rundfunk Berlin Brandenburg<br>Anstalt des öffentlichen Rechts                                         | cross federal | federal  | several  |
| rbb um Sechs                            | RBB Rundfunk Berlin Brandenburg<br>Anstalt des öffentlichen Rechts                                         | cross federal | federal  | several  |
| Reportagen, Hintergründe,<br>Interviews | SWR Aktuell                                                                                                | cross federal | federal  | several  |
| RTL Aktuell                             | 104.6 RTL                                                                                                  | cross federal | federal  | several  |
| rs2                                     | 94,3 rs2 Berlin-Brandenburg Radio                                                                          | cross federal | federal  | several  |
| Sachsen-Anhalt heute                    | MDR Mitteldeutscher Rundfunk - Anstalt<br>des Öffentlichen Rechts                                          | cross federal | federal  | several  |
| SachsenSpiegel                          | MDR Mitteldeutscher Rundfunk - Anstalt<br>des Öffentlichen Rechts                                          | cross federal | federal  | several  |
| Standpunkte                             | NDR Info                                                                                                   | cross federal | federal  | several  |
| SPUTNIK News 15:00                      | MDR Sputnik                                                                                                | cross federal | federal  | several  |
| SWR2 Aktuell mit<br>Nachrichten 18:00   | SWR 2                                                                                                      | cross federal | federal  | several  |
| SWR2 Impuls                             | SWR 2                                                                                                      | cross federal | federal  | several  |
| SWR2 Matinee                            | SWR 2                                                                                                      | cross federal | federal  | several  |
| SWRinfo                                 | SWR Aktuell                                                                                                | cross federal | federal  | several  |
| Tagesgespräch                           | Bayern 2                                                                                                   | cross federal | federal  | several  |
| Umschau (MDR)                           | MDR Mitteldeutscher Rundfunk - Anstalt<br>des Öffentlichen Rechts                                          | cross federal | federal  | several  |
| Umschau (MDR)                           | NA                                                                                                         | cross federal | federal  | several  |
| Umschau (Mi 00:30)                      | Tagesschau24                                                                                               | cross federal | federal  | several  |
| Unser Land                              | BR Bayerischer Rundfunk Anstalt des<br>öffentlichen Rechtes                                                | cross federal | federal  | several  |
| WDR 2                                   | NA                                                                                                         | cross federal | federal  | several  |
| Wochenkurier.info                       | NA                                                                                                         | cross federal | federal  | several  |
| zibb                                    | RBB Rundfunk Berlin Brandenburg<br>Anstalt des öffentlichen Rechts                                         | cross federal | federal  | several  |
| 1&1                                     | NA                                                                                                         | national      | national | national |
| 2 Die Zwei                              | NA                                                                                                         | national      | national | national |
| 3sat-Sendung                            | 3sat                                                                                                       | national      | national | national |
| AD HOC NEWS                             | NA                                                                                                         | national      | national | national |
| alverde                                 | NA                                                                                                         | national      | national | national |
| APA Science                             | NA                                                                                                         | national      | national | national |
| apotheke-adhoc.de                       | NA                                                                                                         | national      | national | national |
| Apotheken Magazin                       | NA                                                                                                         | national      | national | national |
| ARCOR                                   | NA                                                                                                         | national      | national | national |
| ARD-Morgenmagazin                       | ARD Arbeitsgemeinschaft der öffentlich-<br>rechtlichen Rundfunkanstalten der<br>Bundesrepublik Deutschland | national      | national | national |
| ARD-Morgenmagazin                       | Tagesschau24                                                                                               | national      | national | national |
| ARD-Morgenmagazin                       | ZDF Zweites Deutsches Fernsehen Anstalt<br>des öffentlichen Rechts                                         | national      | national | national |
| ARD Infonacht                           | InfoRadio                                                                                                  | national      | national | national |
| az-online.de                            | NA                                                                                                         | national      | national | national |
| AZV Anzeigenzeitungsverlag              | NA                                                                                                         | national      | national | national |
| Baden Online                            | NA                                                                                                         | national      | national | national |

|                                                   |                                                                 |          |          |          |
|---------------------------------------------------|-----------------------------------------------------------------|----------|----------|----------|
| bild der wissenschaft online                      | NA                                                              | national | national | national |
| Bild.de                                           | NA                                                              | national | national | national |
| Bildwoche                                         | NA                                                              | national | national | national |
| blog35215                                         | NA                                                              | national | national | national |
| boote-forum.de                                    | NA                                                              | national | national | national |
| Business Insider Deutschland                      | NA                                                              | national | national | national |
| Codecheck.info                                    | NA                                                              | national | national | national |
| Das Kraftfuttermischwerk                          | NA                                                              | national | national | national |
| Deutschland heute                                 | Deutschlandfunk                                                 | national | national | national |
| Deutschlandfunk                                   | Deutschlandfunk                                                 | national | national | national |
| Deutschlandradio Kultur                           | Deutschlandfunk Kultur                                          | national | national | national |
| Deutschlandradio Kultur                           | NA                                                              | national | national | national |
| Die PTA                                           | NA                                                              | national | national | national |
| Die Reportage                                     | Deutschlandfunk Kultur                                          | national | national | national |
| DIE WELT                                          | NA                                                              | national | national | national |
| Die Welt überregional                             | NA                                                              | national | national | national |
| drehscheibe Deutschland                           | ZDF Zweites Deutsches Fernsehen Anstalt des öffentlichen Rechts | national | national | national |
| Einsfestival-Reportage                            | Einsfestival                                                    | national | national | national |
| Einsfestival-Sendung                              | Einsfestival                                                    | national | national | national |
| esanum                                            | NA                                                              | national | national | national |
| europe online magazine                            | NA                                                              | national | national | national |
| FAZ.net                                           | NA                                                              | national | national | national |
| FOCUS Online                                      | NA                                                              | national | national | national |
| Forschung aktuell                                 | Deutschlandfunk                                                 | national | national | national |
| Frankfurter Neue Presse                           | NA                                                              | national | national | national |
| Frankfurter Rundschau                             | NA                                                              | national | national | national |
| Frühstücksfernsehen                               | SAT.1 Satelliten Fernsehen GmbH                                 | national | national | national |
| Funk Uhr                                          | NA                                                              | national | national | national |
| Galileo                                           | ProSieben Television GmbH                                       | national | national | national |
| gesund24                                          | NA                                                              | national | national | national |
| GMX                                               | NA                                                              | national | national | national |
| GreenTech Germany                                 | NA                                                              | national | national | national |
| Grünstreifen                                      | Deutschlandfunk Nova                                            | national | national | national |
| Gutefrage.net                                     | NA                                                              | national | national | national |
| Guten Morgen Deutschland                          | RTL Television GmbH                                             | national | national | national |
| Guter Rat                                         | NA                                                              | national | national | national |
| Heilpraxisnet.de                                  | NA                                                              | national | national | national |
| Homepage - Galileo.tv - das Online-Wissensmagazin | NA                                                              | national | national | national |
| idowa.de                                          | NA                                                              | national | national | national |
| idw Informationsdienst Wissenschaft               | NA                                                              | national | national | national |
| InfoRadio                                         | InfoRadio                                                       | national | national | national |
| innovations-report.de                             | NA                                                              | national | national | national |
| Linda magazin                                     | NA                                                              | national | national | national |
| Mikroskopie Forum - Index                         | NA                                                              | national | national | national |
| MittelstandsWiki                                  | NA                                                              | national | national | national |
| n-tv                                              | NA                                                              | national | national | national |



|                                  |                                                                 |          |          |          |
|----------------------------------|-----------------------------------------------------------------|----------|----------|----------|
| N24                              | NA                                                              | national | national | national |
| N24 Nachrichten                  | N24 Gesellschaft für Nachrichten und Zeitgeschehen mbH          | national | national | national |
| Nachrichten 00:00-01:00          | VOX Television GmbH                                             | national | national | national |
| Nachrichten 06:00-09:00          | n-tv Nachrichtenfernsehen GmbH                                  | national | national | national |
| Nachrichten 09:00-10:00          | n-tv Nachrichtenfernsehen GmbH                                  | national | national | national |
| Neues Deutschland Bundesausgabe  | NA                                                              | national | national | national |
| news.de                          | NA                                                              | national | national | national |
| news4kids                        | NA                                                              | national | national | national |
| ONE-Reportage                    | ONE                                                             | national | national | national |
| Onetz                            | NA                                                              | national | national | national |
| op-online.de                     | NA                                                              | national | national | national |
| OZON unterwegs                   | ARD-alpha                                                       | national | national | national |
| OZON unterwegs                   | EinsPlus                                                        | national | national | national |
| P.M. Magazin                     | NA                                                              | national | national | national |
| Pharmazeutische Zeitung online   | NA                                                              | national | national | national |
| Pipeline                         | NA                                                              | national | national | national |
| planet e.                        | ZDF Zweites Deutsches Fernsehen Anstalt des öffentlichen Rechts | national | national | national |
| Planet Wissen                    | ARD-alpha                                                       | national | national | national |
| proplanta                        | NA                                                              | national | national | national |
| Punkt Zwölf                      | RTL Television GmbH                                             | national | national | national |
| Redaktionskonferenz              | Deutschlandfunk Nova                                            | national | national | national |
| RTL Aktuell                      | RTL Television GmbH                                             | national | national | national |
| RTL Nachtjournal                 | RTL Television GmbH                                             | national | national | national |
| RTL West für Nordrhein-Westfalen | RTL West GmbH                                                   | national | national | national |
| Schattenblick                    | NA                                                              | national | national | national |
| Sonnenseite                      | NA                                                              | national | national | national |
| Spiegel Online                   | NA                                                              | national | national | national |
| Springer GuP                     | NA                                                              | national | national | national |
| Stern.de                         | NA                                                              | national | national | national |
| Süddeutsche.de                   | NA                                                              | national | national | national |
| Super TV                         | NA                                                              | national | national | national |
| SUPERillu                        | NA                                                              | national | national | national |
| T-Online                         | NA                                                              | national | national | national |
| Tagesschau-Nachrichten           | Tagesschau24                                                    | national | national | national |
| Technology Review (Heise)        | NA                                                              | national | national | national |
| The Epoch Times Deutschland      | NA                                                              | national | national | national |
| Top Agrar                        | NA                                                              | national | national | national |
| Trierischer Volksfreund          | NA                                                              | national | national | national |
| TV Gesund & Leben                | NA                                                              | national | national | national |
| TV piccolino                     | NA                                                              | national | national | national |
| VBIO                             | NA                                                              | national | national | national |
| vetconsult                       | NA                                                              | national | national | national |
| VOX-Sendung                      | VOX Television GmbH                                             | national | national | national |
| Web Nachrichten                  | NA                                                              | national | national | national |
| WEB.DE                           | NA                                                              | national | national | national |

|                                         |                                                                 |                |             |                        |
|-----------------------------------------|-----------------------------------------------------------------|----------------|-------------|------------------------|
| Welt am Sonntag überregional            | NA                                                              | national       | national    | national               |
| Welt der Wunder                         | N24 Gesellschaft für Nachrichten und Zeitgeschehen mbH          | national       | national    | national               |
| WIRED                                   | NA                                                              | national       | national    | national               |
| Wissensnachrichten                      | Deutschlandfunk Nova                                            | national       | national    | national               |
| X:enius                                 | Arte G.E.I.E.                                                   | national       | national    | national               |
| Yahoo! Nachrichten                      | NA                                                              | national       | national    | national               |
| Zeit Online                             | NA                                                              | national       | national    | national               |
| Aachener Nachrichten                    | NA                                                              | regional       | Aachen      | North Rhine-Westphalia |
| Aachener Zeitung                        | NA                                                              | regional       | Aachen      | North Rhine-Westphalia |
| Abendschau                              | Bayerisches Fernsehen Süd                                       | single federal | federal     | Bavaria                |
| Abendschau                              | RBB Berlin                                                      | single federal | federal     | Berlin                 |
| Abendschau                              | RBB Rundfunk Berlin Brandenburg Anstalt des öffentlichen Rechts | single federal | federal     | Berlin                 |
| Abendzeitung München                    | NA                                                              | regional       | Munich      | Bavaria                |
| aktuell                                 | a.tv GmbH & Co. KG                                              | regional       | Augsburg    | Bavaria                |
| Aktuell (Tageszusammenfassung)          | NDR 1 Niedersachsen                                             | single federal | federal     | Lower Saxony           |
| Aktuell am Abend                        | SWR Aktuell                                                     | single federal | federal     | Baden-Württemberg      |
| Alle Wetter                             | Hessischer Rundfunk - Anstalt des öffentlichen Rechts           | single federal | federal     | Hesse                  |
| Allgäuer Zeitung Kempten                | NA                                                              | regional       | Kempten     | Bavaria                |
| Allgemeine Zeitung (Rhein Main Presse)  | NA                                                              | single federal | federal     | Hesse                  |
| Allgemeine Zeitung Coesfeld             | NA                                                              | regional       | Coesfeld    | North Rhine-Westphalia |
| Allgemeine Zeitung Mainz                | NA                                                              | regional       | Mainz       | Rhineland-Palatinate   |
| Alsfelder Allgemeine                    | NA                                                              | regional       | Alsfeld     | Hesse                  |
| Altmark Zeitung Salzwedeler Nachrichten | NA                                                              | regional       | Salzwedel   | Saxony-Anhalt          |
| Am Nachmittag                           | SWR 4 Baden-Württemberg                                         | single federal | federal     | Baden-Württemberg      |
| Antenne-Gespräch                        | Antenne Brandenburg                                             | single federal | federal     | Brandenburg            |
| Antenne Brandenburg                     | Antenne Brandenburg                                             | single federal | federal     | Brandenburg            |
| antenne unna                            | NA                                                              | regional       | Unna        | North Rhine-Westphalia |
| ARD-Buffer                              | SWR Baden-Württemberg                                           | single federal | federal     | Baden-Württemberg      |
| ARD-Buffer                              | RBB Rundfunk Berlin Brandenburg Anstalt des öffentlichen Rechts | single federal | federal     | Berlin                 |
| ARD-Buffer                              | SWR Rheinland-Pfalz                                             | single federal | federal     | Rhineland-Palatinate   |
| ARD-Buffer                              | Saarländischer Rundfunk                                         | single federal | federal     | Saarland               |
| ARD Infonacht                           | B5 aktuell                                                      | single federal | federal     | Bavaria                |
| Augsburger Allgemeine                   | NA                                                              | regional       | Augsburg    | Bavaria                |
| Augsburger Allgemeine                   | NA                                                              | regional       | Augsburg    | Berlin                 |
| Augsburger Allgemeine AS                | NA                                                              | regional       | Augsburg    | Bavaria                |
| B.Z.                                    | NA                                                              | regional       | Berlin      | Berlin                 |
| B5 aktuell                              | B5 aktuell                                                      | single federal | federal     | Bavaria                |
| Bad Vilbeler Neue Presse                | NA                                                              | regional       | Bad Vilbel  | Hesse                  |
| Badische Neueste Nachrichten ST         | NA                                                              | regional       | Karlsruhe   | Baden-Württemberg      |
| Badische Zeitung                        | NA                                                              | regional       | Freiburg    | Baden-Württemberg      |
| Badisches Tagblatt                      | NA                                                              | regional       | Baden-Baden | Baden-Württemberg      |
| Bayerische Rundschau                    | NA                                                              | regional       | Kulmbach    | Bavaria                |
| Bayern 1 am Vormittag                   | Bayern 1                                                        | single federal | federal     | Bavaria                |

|                                             |                                                                    |                |              |                               |
|---------------------------------------------|--------------------------------------------------------------------|----------------|--------------|-------------------------------|
| BAYERN 3 - Update                           | Bayern 3                                                           | single federal | federal      | Bavaria                       |
| Bayern und die Welt                         | Antenne Bayern                                                     | single federal | federal      | Bavaria                       |
| Bayern Update um 12:30                      | Antenne Bayern                                                     | single federal | federal      | Bavaria                       |
| Berlin Report 11:30                         | Radio Berlin 88,8                                                  | regional       | Berlin       | Berlin                        |
| Berlin.de                                   | NA                                                                 | regional       | Berlin       | Berlin                        |
| Berliner Kurier                             | NA                                                                 | regional       | Berlin       | Berlin                        |
| Berliner Morgenpost                         | NA                                                                 | regional       | Berlin       | Berlin                        |
| Berliner Zeitung                            | NA                                                                 | regional       | Berlin       | Berlin                        |
| BerlinOnline                                | NA                                                                 | regional       | Berlin       | Berlin                        |
| BKZ Online                                  | NA                                                                 | regional       | Backnang     | Baden-Württemberg             |
| BlickPunkt Nienburg                         | NA                                                                 | regional       | Nienburg     | Lower Saxony                  |
| Bocholter-Borkener Volksblatt               | NA                                                                 | regional       | Bocholt      | North Rhine-Westphalia        |
| Böhme-Zeitung                               | NA                                                                 | regional       | Soltau       | Lower Saxony                  |
| bonus                                       | Saarländischer Rundfunk                                            | single federal | federal      | Saarland                      |
| Borkener Zeitung                            | NA                                                                 | regional       | Borken       | North Rhine-Westphalia        |
| BR.de - Bayerischer Rundfunk                | NA                                                                 | single federal | federal      | Bavaria                       |
| BR.de Bayerisches Fernsehen                 | NA                                                                 | single federal | federal      | Bavaria                       |
| Brandenburg aktuell                         | RBB Brandenburg                                                    | single federal | federal      | Brandenburg                   |
| Brandenburg aktuell                         | RBB Rundfunk Berlin Brandenburg<br>Anstalt des öffentlichen Rechts | single federal | federal      | Brandenburg                   |
| Braunschweiger Zeitung                      | NA                                                                 | regional       | Braunschweig | Lower Saxony                  |
| Bremer Nachrichten Die Norddeutsche         | NA                                                                 | regional       | Bremen       | Bremen                        |
| Bürstädter Zeitung                          | NA                                                                 | regional       | Bürstadt     | Hesse                         |
| Cellesche Zeitung                           | NA                                                                 | regional       | Celle        | Lower Saxony                  |
| Chemnitzer Morgenpost                       | NA                                                                 | regional       | Chemnitz     | Saxony                        |
| chiemgau24.de                               | NA                                                                 | single federal | federal      | Bavaria                       |
| CityNEWS                                    | NA                                                                 | regional       | Cologne      | North Rhine-Westphalia        |
| come-on.de                                  | NA                                                                 | single federal | federal      | North Rhine-Westphalia        |
| DA-imNetz.de (Dieburger Anzeiger)           | NA                                                                 | regional       | Dieburg      | Hesse                         |
| daheim + unterwegs                          | WDR Westdeutscher Rundfunk Anstalt<br>des öffentlichen Rechts      | single federal | federal      | North Rhine-Westphalia        |
| Darmstädter Echo                            | NA                                                                 | regional       | Darmstadt    | Hesse                         |
| Das Gelbe Blatt                             | NA                                                                 | regional       | Penzberg     | Bavaria                       |
| Der gute Morgen                             | Bremen Zwei                                                        | regional       | Bremen       | Bremen                        |
| Der Morgen                                  | Domradio                                                           | regional       | Cologne      | North Rhine-Westphalia        |
| Der Nachmittag                              | MDR 1 Radio Sachsen                                                | single federal | federal      | Saxony                        |
| Der Neue Tag Weiden                         | NA                                                                 | regional       | Weiden       | Bavaria                       |
| Der Prignitzer Brandenburger Allgemeine     | NA                                                                 | single federal | federal      | Brandenburg                   |
| Der Tag um Vier                             | NDR 1 Radio MV                                                     | single federal | federal      | Mecklenburg-Western Pomerania |
| Der Tagesspiegel                            | NA                                                                 | regional       | Berlin       | Berlin                        |
| DEWEZET Deister-und<br>Weserzeitung         | NA                                                                 | regional       | Hameln       | North Rhine-Westphalia        |
| DEWEZET.de                                  | NA                                                                 | regional       | Hameln       | North Rhine-Westphalia        |
| Die besten Schlager und<br>Oldies (14 - 19) | HR4                                                                | single federal | federal      | Hesse                         |
| Die Glocke                                  | NA                                                                 | regional       | Oelde        | North Rhine-Westphalia        |

|                                 |                     |                |                    |                        |
|---------------------------------|---------------------|----------------|--------------------|------------------------|
| Die Oberbadische                | NA                  | regional       | Lörrach            | Baden-Württemberg      |
| Dieburger Anzeiger              | NA                  | regional       | Dieburg            | Hesse                  |
| Dresdner Neueste Nachrichten    | NA                  | regional       | Dresden            | Saxony                 |
| Dülmener Zeitung                | NA                  | regional       | Dülmen             | North Rhine-Westphalia |
| Echo Online                     | NA                  | regional       | Darmstadt          | Hesse                  |
| echo24.de                       | NA                  | regional       | Heilbronn          | Baden-Württemberg      |
| Ehinger Tagblatt                | NA                  | regional       | Ehingen            | Baden-Württemberg      |
| eisenberg.TLZ.de                | NA                  | regional       | Eisenberg          | Thuringia              |
| Elbe-Jeetzel-Zeitung            | NA                  | regional       | Lüchow             | Lower Saxony           |
| Elbe-Jeetzel-Zeitung online     | NA                  | regional       | Lüchow             | Lower Saxony           |
| Emder Zeitung                   | NA                  | regional       | Emden              | Lower Saxony           |
| Express Köln                    | NA                  | regional       | Cologne            | North Rhine-Westphalia |
| Express.de                      | NA                  | regional       | Cologne            | North Rhine-Westphalia |
| fehmar 24                       | NA                  | single federal | federal            | Schleswig-Holstein     |
| Flensburger Tageblatt           | NA                  | regional       | Flensburg          | Schleswig-Holstein     |
| FluxFM aktuell 15:00            | FluxFM              | regional       | Berlin             | Berlin                 |
| FluxFM aktuell 16:00            | FluxFM              | regional       | Berlin             | Berlin                 |
| FORUM (Freising)                | NA                  | regional       | Freising           | Bavaria                |
| Frankenpost                     | NA                  | regional       | Hof                | Bavaria                |
| Fränkische Nachrichten          | NA                  | regional       | Tauberbischofsheim | Bavaria                |
| Fränkischer Tag                 | NA                  | regional       | Bamberg            | Bavaria                |
| Freie Presse Chemnitzer Zeitung | NA                  | regional       | Chemnitz           | Saxony                 |
| freiepresse.de                  | NA                  | single federal | federal            | Saxony                 |
| Freies Wort Suhl                | NA                  | regional       | Suhl               | Thuringia              |
| Fuldaer Zeitung                 | NA                  | regional       | Fulda              | Hesse                  |
| Gäubote                         | NA                  | regional       | Herrenberg         | Baden-Württemberg      |
| Gelnhäuser Tageblatt            | NA                  | regional       | Gelnhausen         | Hesse                  |
| General-Anzeiger Bonn           | NA                  | regional       | Bonn               | North Rhine-Westphalia |
| Gießener Allgemeine             | NA                  | regional       | Gießen             | Hesse                  |
| Gießener Anzeiger               | NA                  | regional       | Gießen             | Hesse                  |
| GMÜNDER TAGESPOST               | NA                  | regional       | Schwäbisch Gmünd   | Baden-Württemberg      |
| Goslarsche Zeitung              | NA                  | regional       | Goslar             | Lower Saxony           |
| Göttinger Tageblatt             | NA                  | regional       | Göttingen          | Lower Saxony           |
| Guten Morgen Sachsen            | MDR 1 Radio Sachsen | single federal | federal            | Saxony                 |
| Haller Kreisblatt               | NA                  | regional       | Halle              | Saxony-Anhalt          |
| Hallo Brandenburg               | Antenne Brandenburg | single federal | federal            | Brandenburg            |
| Hallo München                   | NA                  | regional       | Munich             | Bavaria                |
| Hamburg "Der Morgen"            | NDR 90,3            | regional       | Hamburg            | Hamburg                |
| Hamburger Abendblatt            | NA                  | regional       | Hamburg            | Hamburg                |
| Hamburger Morgenpost            | NA                  | regional       | Hamburg            | Hamburg                |
| Hannoversche Allgemeine Zeitung | NA                  | regional       | Hannover           | Lower Saxony           |
| Harz Kurier Herzberger Zeitung  | NA                  | regional       | Herzberg           | Lower Saxony           |
| Heidelberg24                    | NA                  | regional       | Heidelberg         | Baden-Württemberg      |
| Heilbronner Stimme              | NA                  | regional       | Heilbronn          | Baden-Württemberg      |

|                                                   |                                                            |                |             |                        |
|---------------------------------------------------|------------------------------------------------------------|----------------|-------------|------------------------|
| heimatzeitung.de                                  | NA                                                         | single federal | federal     | Bavaria                |
| Hellweger Anzeiger Unna                           | NA                                                         | regional       | Unna        | North Rhine-Westphalia |
| Hersfelder Zeitung                                | NA                                                         | regional       | Hersfeld    | Hesse                  |
| Hessen & die Welt                                 | Hitradio FFH                                               | single federal | federal     | Hesse                  |
| Hessisch Niedersächsische Allgemeine              | NA                                                         | single federal | federal     | Hesse                  |
| Hildesheimer Allgemeine Zeitung                   | NA                                                         | regional       | Hildesheim  | Lower Saxony           |
| Höchster Kreisblatt                               | NA                                                         | regional       | Höchst      | Hesse                  |
| hr-iNFO                                           | HR Info                                                    | single federal | federal     | Hesse                  |
| hr1                                               | HR1                                                        | single federal | federal     | Hesse                  |
| hr1                                               | NA                                                         | single federal | federal     | Hesse                  |
| Ihr Vormittag                                     | Radio Berlin 88,8                                          | regional       | Berlin      | Berlin                 |
| IKZ - Iserlohner Kreisanzeiger                    | NA                                                         | regional       | Iserlohn    | North Rhine-Westphalia |
| in Südthüringen.de                                | NA                                                         | single federal | federal     | Thuringia              |
| innsalzach24.de                                   | NA                                                         | single federal | federal     | Bavaria                |
| IQ - Wissenschaft und Forschung                   | Bayern 2                                                   | single federal | federal     | Bavaria                |
| Kieler Nachrichten                                | NA                                                         | regional       | Kiel        | Schleswig-Holstein     |
| Kölnische Rundschau                               | NA                                                         | regional       | Cologne     | North Rhine-Westphalia |
| Kompakt                                           | Domradio                                                   | regional       | Cologne     | North Rhine-Westphalia |
| Kreis-Anzeiger (Wetterau)                         | NA                                                         | regional       | Friedberg   | Hesse                  |
| Kreisbote                                         | NA                                                         | single federal | federal     | Bavaria                |
| Kreiszeitung Böblinger Bote                       | NA                                                         | regional       | Böblingen   | Baden-Württemberg      |
| Kreiszeitung Syker Zeitung                        | NA                                                         | regional       | Syke        | Lower Saxony           |
| Kreiszeitung Wesermarsch                          | NA                                                         | regional       | Nordenham   | Lower Saxony           |
| Kurierverlag                                      | NA                                                         | regional       | Memmingen   | Bavaria                |
| Lampertheimer Zeitung                             | NA                                                         | regional       | Lampertheim | Hesse                  |
| Landeszeitung für die Lüneburger Heide            | NA                                                         | regional       | Lüneburg    | Lower Saxony           |
| Lauterbacher Anzeiger                             | NA                                                         | regional       | Lauterbach  | Hesse                  |
| leinetal24.de                                     | NA                                                         | single federal | federal     | Lower Saxony           |
| Leipzig kompakt 18:20                             | Radio Leipzig                                              | regional       | Leipzig     | Saxony                 |
| Leipziger Volkszeitung                            | NA                                                         | regional       | Leipzig     | Saxony                 |
| Leonardo: Wissenschaft und mehr                   | WDR 5                                                      | single federal | federal     | North Rhine-Westphalia |
| Lippische Landeszeitung                           | NA                                                         | single federal | federal     | North Rhine-Westphalia |
| LN Online - Lübecker Nachrichten                  | NA                                                         | regional       | Lübeck      | Schleswig-Holstein     |
| Lokalzeit aus Bonn (Di-Sa 10:00)                  | WDR Bonn                                                   | regional       | Bonn        | North Rhine-Westphalia |
| Lokalzeit aus Bonn (Mo-Sa 6:20)                   | WDR Westdeutscher Rundfunk Anstalt des öffentlichen Rechts | regional       | Bonn        | North Rhine-Westphalia |
| Lokalzeit aus Bonn 19:30                          | WDR Bonn                                                   | regional       | Bonn        | North Rhine-Westphalia |
| LS aktuell Baden-Württemberg 18:00                | SWR Baden-Württemberg                                      | single federal | federal     | Baden-Württemberg      |
| Lünepost am Wochenende                            | NA                                                         | regional       | Lüneburg    | Lower Saxony           |
| Magdeburger Volksstimme<br>Magdeburgische Zeitung | NA                                                         | regional       | Magdeburg   | Saxony-Anhalt          |
| Maintal Tagesanzeiger                             | NA                                                         | regional       | Hanau       | Hesse                  |
| Mannheim24                                        | NA                                                         | regional       | Mannheim    | Baden-Württemberg      |
| Märkische Allgemeine                              | NA                                                         | single federal | federal     | Brandenburg            |

|                                             |                                      |                |                       |                               |
|---------------------------------------------|--------------------------------------|----------------|-----------------------|-------------------------------|
| Märkische Allgemeine Potsdamer Tageszeitung | NA                                   | regional       | Potsdam               | Brandenburg                   |
| Märkische Oderzeitung                       | NA                                   | regional       | Frankfurt an der Oder | Brandenburg                   |
| Märkische Oderzeitung Frankfurter Stadtbote | NA                                   | regional       | Frankfurt an der Oder | Brandenburg                   |
| MDR 1 Sachsen-Anhalt                        | MDR Radio Sachsen-Anhalt             | single federal | federal               | Saxony-Anhalt                 |
| MDR Thüringen                               | MDR Radio Thüringen                  | single federal | federal               | Thuringia                     |
| Meininger Tageblatt                         | NA                                   | regional       | Meiningen             | Thuringia                     |
| Merkur.de                                   | NA                                   | regional       | Munich                | Bavaria                       |
| Mindener Tageblatt                          | NA                                   | regional       | Minden                | North Rhine-Westphalia        |
| Mit WDR 2 in den Feierabend                 | WDR 2                                | single federal | federal               | North Rhine-Westphalia        |
| Mittagsschau kompakt 13:00                  | NDR 1 Radio MV                       | single federal | federal               | Mecklenburg-Western Pomerania |
| Mittelbayerische Zeitung                    | NA                                   | single federal | federal               | Bavaria                       |
| Mittelbayerische Zeitung Tagesanzeiger      | NA                                   | single federal | federal               | Bavaria                       |
| Mitteldeutsche Zeitung Halle / Saalkreis    | NA                                   | regional       | Halle                 | Saxony-Anhalt                 |
| mittelhessen                                | NA                                   | single federal | federal               | Hesse                         |
| morgenweb                                   | NA                                   | regional       | Mannheim              | Baden-Württemberg             |
| Münsterländische Volkszeitung               | NA                                   | regional       | Rheine                | North Rhine-Westphalia        |
| Münstersche Zeitung Westfalen-Anzeiger      | NA                                   | regional       | Münster               | North Rhine-Westphalia        |
| Münstersche Zeitung.de                      | NA                                   | regional       | Münster               | North Rhine-Westphalia        |
| Nachrichten 06:00                           | Neue Berliner Rundfunk GmbH & Co KG  | regional       | Berlin                | Berlin                        |
| Nachrichten 06:00                           | Radio Charivari Würzburg             | regional       | Würzburg              | Bavaria                       |
| Nachrichten 08:00                           | Neue Berliner Rundfunk GmbH & Co KG  | regional       | Berlin                | Berlin                        |
| Nachrichten 08:00                           | Radio Charivari Würzburg             | regional       | Würzburg              | Bavaria                       |
| Nachrichten 10:00                           | Neue Berliner Rundfunk GmbH & Co KG  | regional       | Berlin                | Berlin                        |
| Nachrichten 11:00                           | Neue Berliner Rundfunk GmbH & Co KG  | regional       | Berlin                | Berlin                        |
| Nachrichten 13:00                           | Radio Hamburg GmbH & Co. KG          | regional       | Hamburg               | Hamburg                       |
| Nachrichten 14:00                           | Radio Hamburg GmbH & Co. KG          | regional       | Hamburg               | Hamburg                       |
| Nachrichten 14:00                           | Radio Charivari Würzburg             | regional       | Würzburg              | Bavaria                       |
| Nachrichten 14:55                           | Energy Bremen                        | regional       | Bremen                | Bremen                        |
| Nachrichten 15:00                           | radio B2                             | single federal | federal               | Bavaria                       |
| Nachrichten 15:55                           | Energy Bremen                        | regional       | Bremen                | Bremen                        |
| Nachrichten 16:00                           | radio B2                             | single federal | federal               | Bavaria                       |
| Nachrichten 16:00                           | Radio Charivari Würzburg             | regional       | Würzburg              | Bavaria                       |
| Nachrichten 17:00                           | Radio Charivari Würzburg             | regional       | Würzburg              | Bavaria                       |
| Nachrichten 18:00                           | WDR 2                                | single federal | federal               | North Rhine-Westphalia        |
| Nachrichten 18:00                           | WDR 5                                | single federal | federal               | North Rhine-Westphalia        |
| Nachrichten 19:00                           | SWR 4 Baden-Württemberg              | single federal | federal               | Baden-Württemberg             |
| Nachrichten 19:00                           | SWR 4 Rheinland-Pfalz                | single federal | federal               | Rhineland-Palatinate          |
| Nachrichten 19:53                           | Radio Gong 96,3                      | single federal | federal               | Bavaria                       |
| Nachrichten 20:00                           | Radio Arabella Studiobetriebsges mbH | single federal | federal               | Bavaria                       |
| Nachrichten 20:00                           | Radio Charivari Würzburg             | regional       | Würzburg              | Bavaria                       |
| Nachrichten für Niedersachsen 18:00         | radio ffn                            | single federal | federal               | Lower Saxony                  |
| Nassauische Neue Presse                     | NA                                   | regional       | Nassau                | Rhineland-Palatinate          |

|                                              |                                                            |                |              |                               |
|----------------------------------------------|------------------------------------------------------------|----------------|--------------|-------------------------------|
| NDR 1 Radio MV aktuell 22:00                 | NDR 1 Radio MV                                             | single federal | federal      | Mecklenburg-Western Pomerania |
| NDR1 Niedersachsen Aktuell 19:00             | NDR 1 Niedersachsen                                        | single federal | federal      | Lower Saxony                  |
| NDZ.de Neue Deister Zeitung                  | NA                                                         | regional       | Hameln       | Lower Saxony                  |
| Netzwelt                                     | HR Info                                                    | single federal | federal      | Hesse                         |
| Neu-Isenburger Neue Presse                   | NA                                                         | regional       | Neu-Isenburg | Hesse                         |
| Neue Osnabrücker Zeitung                     | NA                                                         | regional       | Osnabrück    | Lower Saxony                  |
| Neue Presse Coburg                           | NA                                                         | regional       | Coburg       | Bavaria                       |
| Neue Westfälische                            | NA                                                         | single federal | federal      | North Rhine-Westphalia        |
| Neue Westfälische Bielefelder Tageblatt OH   | NA                                                         | regional       | Bielefeld    | North Rhine-Westphalia        |
| Niedersachsen 18.00                          | NDR Niedersachsen                                          | single federal | federal      | Lower Saxony                  |
| nordbayern.de                                | NA                                                         | single federal | federal      | Bavaria                       |
| Norddeutsche Neueste Nachrichten             | NA                                                         | regional       | Rostock      | Mecklenburg-Western Pomerania |
| Nordkurier                                   | NA                                                         | single federal | federal      | Mecklenburg-Western Pomerania |
| Nordmagazin                                  | NDR Mecklenburg-Vorpommern                                 | single federal | federal      | Mecklenburg-Western Pomerania |
| Nordwest-Zeitung                             | NA                                                         | regional       | Oldenburg    | Lower Saxony                  |
| NRZ - Neue Ruhr Zeitung                      | NA                                                         | single federal | federal      | North Rhine-Westphalia        |
| Nürnberger Nachrichten                       | NA                                                         | regional       | Nürnberg     | Bavaria                       |
| Nürtinger Zeitung                            | NA                                                         | regional       | Nürtingen    | Baden-Württemberg             |
| NZ Nürnberger Zeitung NZS                    | NA                                                         | regional       | Nürnberg     | Bavaria                       |
| Oberhessische Presse                         | NA                                                         | regional       | Marburg      | Hesse                         |
| Oberhessische Zeitung                        | NA                                                         | regional       | Alsfeld      | Hesse                         |
| Offenbach-Post                               | NA                                                         | regional       | Offenbach    | Hesse                         |
| Oranienburger Generalanzeiger                | NA                                                         | regional       | Oranienburg  | Brandenburg                   |
| Ostfriesische Nachrichten                    | NA                                                         | regional       | Aurich       | Lower Saxony                  |
| Ostsee-Zeitung                               | NA                                                         | single federal | federal      | Mecklenburg-Western Pomerania |
| Ostseewelle HIT-RADIO Mecklenburg-Vorpommern | NA                                                         | single federal | federal      | Mecklenburg-Western Pomerania |
| Ostthüringer Zeitung                         | NA                                                         | single federal | federal      | Thuringia                     |
| OVB online (Oberbayerisches Volksblatt)      | NA                                                         | single federal | federal      | Bavaria                       |
| Panorama                                     | Antenne Brandenburg                                        | single federal | federal      | Brandenburg                   |
| Pirmasenser Zeitung                          | NA                                                         | regional       | Pirmasens    | Rhineland-Palatinate          |
| Planet Wissen                                | WDR Westdeutscher Rundfunk Anstalt des öffentlichen Rechts | single federal | federal      | North Rhine-Westphalia        |
| Planet Wissen                                | SWR Baden-Württemberg                                      | single federal | federal      | Baden-Württemberg             |
| Planet Wissen                                | SWR Rheinland-Pfalz                                        | single federal | federal      | Rhineland-Palatinate          |
| Planet Wissen                                | Saarländischer Rundfunk                                    | single federal | federal      | Saarland                      |
| Platzhalter Bayern 1 München                 | Bayern 1                                                   | single federal | federal      | Bavaria                       |
| Platzhalter Radio NRW                        | Lokalradio Düsseldorf Betriebsgesellschaft mbH & Co. KG    | regional       | Düsseldorf   | North Rhine-Westphalia        |
| Potsdam am Sonntag                           | NA                                                         | regional       | Potsdam      | Brandenburg                   |
| Potsdamer Neueste Nachrichten                | NA                                                         | regional       | Potsdam      | Brandenburg                   |
| Punkt                                        | Radio Regenbogen Hörfunk in Baden GmbH & Co. KG            | single federal | federal      | Baden-Württemberg             |
| Pyrmonter Nachrichten                        | NA                                                         | regional       | Pyrmont      | Lower Saxony                  |
| Radio B2                                     | radio B2                                                   | single federal | federal      | Bavaria                       |

|                                                  |                                                          |                |                |                               |
|--------------------------------------------------|----------------------------------------------------------|----------------|----------------|-------------------------------|
| Radio Chemnitz                                   | NA                                                       | regional       | Chemnitz       | Saxony                        |
| Radio SAW Online                                 | NA                                                       | single federal | federal        | Saxony-Anhalt                 |
| Recklinghäuser Zeitung                           | NA                                                       | regional       | Recklinghausen | North Rhine-Westphalia        |
| regio-news.de                                    | NA                                                       | regional       | Karlsruhe      | Baden-Württemberg             |
| Regional-News aus Potsdam                        | Antenne Brandenburg Potsdam                              | regional       | Potsdam        | Brandenburg                   |
| Regionaljournal                                  | Antenne Brandenburg                                      | single federal | federal        | Brandenburg                   |
| regionalZeit - Südbayern                         | Bayern 2                                                 | single federal | federal        | Bavaria                       |
| Remscheider General-Anzeiger                     | NA                                                       | regional       | Remscheid      | North Rhine-Westphalia        |
| Reutlinger General-Anzeiger                      | NA                                                       | regional       | Reutlingen     | Baden-Württemberg             |
| Rhein-Neckar-Zeitung                             | NA                                                       | regional       | Heidelberg     | Baden-Württemberg             |
| Rhein-Zeitung                                    | NA                                                       | single federal | federal        | Rhineland-Palatinate          |
| Rhein-Zeitung Koblenz                            | NA                                                       | regional       | Koblenz        | Rhineland-Palatinate          |
| Rhein Main EXTRA TIPP                            | NA                                                       | single federal | federal        | Hesse                         |
| RHEIN MAIN PRESSE                                | NA                                                       | single federal | federal        | Hesse                         |
| Rheinische Post D Düsseldorf                     | NA                                                       | regional       | Düsseldorf     | North Rhine-Westphalia        |
| rosenheim24.de                                   | NA                                                       | regional       | Rosenheim      | Bavaria                       |
| Rotenburger Kreiszeitung                         | NA                                                       | regional       | Rotenburg      | Lower Saxony                  |
| RP-Online Rheinische Post                        | NA                                                       | single federal | federal        | North Rhine-Westphalia        |
| RTL Hessen                                       | RTL Hessen GmbH                                          | single federal | federal        | Hesse                         |
| Ruhr Nachrichten Dortmunder Zeitung Süd (D1)     | NA                                                       | regional       | Dortmund       | North Rhine-Westphalia        |
| Rundschau-Magazin                                | BR Bayerischer Rundfunk Anstalt des öffentlichen Rechtes | single federal | federal        | Bavaria                       |
| Rüsselsheimer Echo                               | NA                                                       | regional       | Rüsselsheim    | Hesse                         |
| Saale-Zeitung                                    | NA                                                       | regional       | Bad Kissingen  | Bavaria                       |
| Sachsen-Anhalt heute                             | MDR Sachsen-Anhalt                                       | single federal | federal        | Saxony-Anhalt                 |
| SachsenSpiegel                                   | MDR Sachsen                                              | single federal | federal        | Saxony                        |
| Sächsische Zeitung                               | NA                                                       | regional       | Dresden        | Saxony                        |
| Sächsische Zeitung - SZ-Online.de                | NA                                                       | regional       | Dresden        | Saxony                        |
| Sauerland-Kurier                                 | NA                                                       | regional       | Olpe           | North Rhine-Westphalia        |
| SauerlandKurier                                  | NA                                                       | regional       | Olpe           | North Rhine-Westphalia        |
| Schaumburg-Lippische Landes-Zeitung.de           | NA                                                       | regional       | Schaumburg     | Lower Saxony                  |
| Schaumburger Nachrichten                         | NA                                                       | regional       | Schaumburg     | Lower Saxony                  |
| Schaumburger Zeitung                             | NA                                                       | regional       | Schaumburg     | Lower Saxony                  |
| Schaumburger Zeitung.de                          | NA                                                       | regional       | Schaumburg     | Lower Saxony                  |
| Schwäbische Post                                 | NA                                                       | single federal | federal        | Bavaria                       |
| Schwäbische Zeitung                              | NA                                                       | single federal | federal        | Bavaria                       |
| Schwäbische Zeitung Ravensburg                   | NA                                                       | regional       | Ravensburg     | Bavaria                       |
| Schweriner Volkszeitung Mecklenburgische Zeitung | NA                                                       | regional       | Schwerin       | Mecklenburg-Western Pomerania |
| Segeberger Zeitung                               | NA                                                       | regional       | Segeberg       | Schleswig-Holstein            |
| Service: Gesundheit                              | Hessischer Rundfunk - Anstalt des öffentlichen Rechts    | single federal | federal        | Hesse                         |
| SHZ.de                                           | NA                                                       | single federal | federal        | Schleswig-Holstein            |
| Siegener Zeitung                                 | NA                                                       | regional       | Siegen         | North Rhine-Westphalia        |



|                                                 |           |                |               |                               |
|-------------------------------------------------|-----------|----------------|---------------|-------------------------------|
| Siegerland-Kurier                               | NA        | regional       | Siegen        | North Rhine-Westphalia        |
| Soester Anzeiger                                | NA        | regional       | Soest         | North Rhine-Westphalia        |
| Solinger Tageblatt                              | NA        | regional       | Solingen      | North Rhine-Westphalia        |
| Sonntagsjournal der Bremervörder Zeitung        | NA        | regional       | Gnarrenburg   | Lower Saxony                  |
| Sonntagsjournal der Nordsee-Zeitung             | NA        | single federal | federal       | Lower Saxony                  |
| Sonntagsjournal der Zevener Zeitung             | NA        | regional       | Zeven         | Lower Saxony                  |
| Stuttgarter Nachrichten                         | NA        | regional       | Stuttgart     | Baden-Württemberg             |
| Stuttgarter Zeitung                             | NA        | regional       | Stuttgart     | Baden-Württemberg             |
| Stuttgarter Zeitung D                           | NA        | regional       | Stuttgart     | Baden-Württemberg             |
| STZ Südthüringer Zeitung Bad Salzungen          | NA        | regional       | Bad Salzungen | Thuringia                     |
| Südwest Presse                                  | NA        | regional       | Ulm           | Baden-Württemberg             |
| SVZ.de Schweriner Volkszeitung                  | NA        | regional       | Schwerin      | Mecklenburg-Western Pomerania |
| Taunus Zeitung                                  | NA        | regional       | Bad Homburg   | Hesse                         |
| Thüringer Allgemeine                            | NA        | regional       | Erfurt        | Thuringia                     |
| Thüringische Landeszeitung                      | NA        | regional       | Erfurt        | Thuringia                     |
| tv.berlin Aktuell                               | TV Berlin | regional       | Berlin        | Berlin                        |
| TZ online                                       | NA        | regional       | Berlin        | Berlin                        |
| Uckermark Kurier                                | NA        | single federal | federal       | Brandenburg                   |
| Usinger Anzeiger                                | NA        | regional       | Usingen       | Hesse                         |
| volksfreund.de                                  | NA        | regional       | Trier         | Rhineland-Palatinate          |
| WA.de - Westfälischer Anzeiger                  | NA        | regional       | Hamm          | North Rhine-Westphalia        |
| Waldeckische Landeszeitung                      | NA        | regional       | Waldeck       | Hesse                         |
| Walsroder Zeitung                               | NA        | regional       | Walsrode      | Lower Saxony                  |
| Waltroper Zeitung                               | NA        | regional       | Waltrop       | North Rhine-Westphalia        |
| WAZ - Westdeutsche Allgemeine Zeitung           | NA        | single federal | federal       | North Rhine-Westphalia        |
| WDR 2 am Sonntag (09:00-14:00)                  | WDR 2     | single federal | federal       | North Rhine-Westphalia        |
| WDR 2 Servicezeit                               | WDR 2     | single federal | federal       | North Rhine-Westphalia        |
| WDR 3 Resonanzen                                | WDR 3     | single federal | federal       | North Rhine-Westphalia        |
| Werra-Rundschau                                 | NA        | regional       | Eschwege      | Hesse                         |
| Weser Kurier Bremer Tageszeitung                | NA        | regional       | Bremen        | Bremen                        |
| Westdeutsche Zeitung                            | NA        | regional       | Wuppertal     | North Rhine-Westphalia        |
| Westdeutscher Rundfunk                          | NA        | regional       | Wuppertal     | North Rhine-Westphalia        |
| Westfälische Nachrichten                        | NA        | regional       | Münster       | North Rhine-Westphalia        |
| Westfälische Nachrichten Münsterischer Anzeiger | NA        | regional       | Münster       | North Rhine-Westphalia        |
| Wetterauer Zeitung                              | NA        | regional       | Friedberg     | Hesse                         |
| Wetzlarer Neue Zeitung                          | NA        | regional       | Wetzlar       | Hesse                         |
| Wiesbadener Kurier                              | NA        | regional       | Wiesbaden     | Hesse                         |
| Wiesbadener Tagblatt                            | NA        | regional       | Wiesbaden     | Hesse                         |
| Wilhelmshavener Zeitung                         | NA        | regional       | Wilhelmshaven | Lower Saxony                  |
| Winsener Anzeiger                               | NA        | regional       | Winsen        | Lower Saxony                  |

|                                            |    |                |            |                        |
|--------------------------------------------|----|----------------|------------|------------------------|
| Wolfsburger Allgemeine                     | NA | regional       | Wolfsburg  | Lower Saxony           |
| Wormser Zeitung                            | NA | regional       | Worms      | Rhineland-Palatinate   |
| WP - Westfalenpost                         | NA | regional       | Hagen      | North Rhine-Westphalia |
| WR - Westfälische Rundschau                | NA | single federal | federal    | North Rhine-Westphalia |
| WR Westfälische Rundschau Kamen, Bergkamen | NA | regional       | Kamen      | North Rhine-Westphalia |
| WZ Westdeutsche Zeitung Düsseldorf         | NA | regional       | Düsseldorf | North Rhine-Westphalia |
| Zevener Zeitung                            | NA | regional       | Zeven      | Lower Saxony           |
| Zollern-Alb Kurier                         | NA | regional       | Balingen   | Baden-Württemberg      |

**S3 Table: Annual numbers of media reports and submissions**

| <b>Year</b> | <b>Media reports</b> | <b>Submissions</b> |
|-------------|----------------------|--------------------|
| 2014        | 31                   | 1903               |
| 2015        | 66                   | 1221               |
| 2016        | 542                  | 7756               |
| 2017        | 295                  | 5730               |

**S4 Table: Headlines of the Berlin/Brandenburg office dpa-releases used for qualitative analysis.** The clipping service sometimes recorded a dpa-release several times in one day, the number of these duplications are enclosed in brackets. Daily previews announcing dpa-releases were not included.

| <b>dpa-release headline (in German)</b>                               | <b>Release date</b> |
|-----------------------------------------------------------------------|---------------------|
| Auch Mücken und Nacktschnecken lieben den Start-up-Sommer (2)         | 20.05.2014          |
| Sommerstart auch für Mücken und Nacktschnecken                        | 20.05.2014          |
| Mückenatlas: Forscher fahnden nach neuen Stechmückenarten             | 25.05.2015          |
| Biologin: Mückensaison bislang lau - «Ohne Wasser keine Mücken»       | 08.08.2015          |
| Biologin: Mückensaison bislang lau - «Ohne Wasser keine Mücken»       | 09.08.2015          |
| Beißen und Stechen - Welche Tiere im Sommer besonders nerven          | 14.08.2015          |
| Jede Mücke zählt - Wie sich Exoten in Deutschland etablieren          | 16.11.2015          |
| 2015 war kein Mückenjahr - Weniger Einsendungen für den Mückenatlas   | 16.11.2015          |
| Sommer, Sonne, Mücke - Plagegeister surren wieder                     | 23.05.2016          |
| Verdächtiges Surren: Mücken fliegen wieder                            | 23.05.2016          |
| <b>Forscher-Bitte: Bürger sollen Mücken schicken</b>                  | <b>06.06.2016</b>   |
| <b>Mückenplage droht - Bürger sollen Exemplare einschicken (3)</b>    | <b>06.06.2016</b>   |
| Mückenforscher freuen sich über so viel Post wie nie zuvor            | 02.11.2016          |
| Mückenjäger fangen 30 000 Tiere für die Forschung                     | 02.11.2016          |
| Mückenforscherin kartiert die kleinen Plagegeister                    | 03.02.2017          |
| 33 500 Mücken und noch lange kein Ende                                | 03.02.2017          |
| Sie sind schon da: Sonniger Frühling lässt Mücken eher ausschwärmen   | 10.04.2017          |
| Stechende Plagegeister - warmer Frühsommer gut für Mücken             | 03.06.2017          |
| Surren und Stechen: Warmer Frühsommer ist für Mücken ideal            | 03.06.2017          |
| Surren und Stechen: Warmer Frühsommer ist für Mücken ideal            | 05.06.2017          |
| Nach dem Regen: Hochsaison für Mücken                                 | 22.07.2017          |
| Expertin zur Mückenplage                                              | 22.07.2017          |
| Das große Surren - alle zwei Wochen neue Mückengeneration             | 22.07.2017          |
| Expertin zur Mückenplage                                              | 23.07.2017          |
| Das große Surren - alle zwei Wochen neue Mückengeneration             | 23.07.2017          |
| Sommer 2017 ist ideal für Mücken und schlecht für Wespen              | 28.07.2017          |
| «Die Mücken schreien hurra» - ideale Bedingungen nach Regenflut       | 28.07.2017          |
| «Mücke tobt überall» - Nahender Herbst treibt Hausmücken in Verstecke | 07.09.2017          |
| «Es ist die Hölle»: Nahender Herbst treibt Stechmücken ins Haus       | 07.09.2017          |
